# Supplementary material for: State- and Territory-Level Nursing Home and Home Health Care COVID-19 Policies and Disease Burden
Source: JAMA Netw Open. 2024 Apr 22;7(4):e247683. doi: 10.1001/jamanetworkopen.2024.7683 (PMC11036140; doi:10.1001/jamanetworkopen.2024.7683)
Supplement: Supplement 2. — Data Sharing Statement [file jamanetwopen-e247683-s002.pdf]

## Data Sharing Statement

Stone. State- and Territory-Level Nursing Home and Home Health Care COVID-19 Policies and Disease Burden. *JAMA Netw Open*. Published April 22, 2024.

doi:10.1001/jamanetworkopen.2024.7683

### Data

**Data available:** Yes

**Data types:** Other (please specify)

**Additional Information:** Dashboard and technical documentation

**How to access data:** Dashboard and technical documentation will be publicly available at

[https://www.nursing.columbia.edu/PAC\\_Dashboard](https://www.nursing.columbia.edu/PAC_Dashboard).

**When available:** With publication

### Supporting Documents

**Document types:** Other (please specify)

**Additional Information:** Underlying data and data dictionary

**How to access documents:** Underlying data and data dictionary will be available by request

at [https://www.nursing.columbia.edu/PAC\\_Dashboard](https://www.nursing.columbia.edu/PAC_Dashboard).

**When available:** With publication

### Additional Information

**Who can access the data:** Researchers whose proposed use of the data has been approved.

They will be able to fill out a form on [https://www.nursing.columbia.edu/PAC\\_Dashboard](https://www.nursing.columbia.edu/PAC_Dashboard) to request underlying data and data dictionary.

**Types of analyses:** For any type of research.

**Mechanisms of data availability:** After a researcher fills out the online form and the information is reviewed by the research team, the requesting researcher will be sent the underlying data (via Excel) and data dictionary (Word).

**Any additional restrictions:** N/A.
